# Supplementary material for: Prioritizing functional modules mediating genetic perturbations and their phenotypic effects: a global strategy
Source: PubMed Central journal article supplement (PMC2646278; doi:10.1186/gb-2008-9-12-r174), 2008-12-16

## Simulation study

The purpose of this simulation study is to quantify the sensitivity of the BN and HG method to two factors which could affect their performance in identifying causal modules among overlapping sets. In the context of lethal protein complexes prediction, the two factors considered in the study are (1) the degree of overlap among protein complexes, (2) the proportion of lethal genes in a lethal complex.

The parameters we used to simulate protein complexes, complex lethality and gene lethality are from the 390 curated protein complexes or the 94 curated lethal protein complexes identified by the BN model. Below are details about the simulation study.

- (a) *Simulate protein complexes.* From a pool of 1376 genes (the total number of genes associated with the 390 curated protein complexes), we simulate  $n$  protein complexes. Each simulated protein complex is a random sample of the 1376 genes. The complex size follows the distribution of that of the 390 curated protein complexes.
- (b) *Simulate protein complex lethality.* We randomly assign 24% of the  $n$  protein complexes simulated in (a) as lethal protein complexes, and the rest as nonlethal protein complexes. 24% is the proportion of lethal protein complexes (94 out of 390) among the curated protein complexes identified by the BN model.
- (c) *Simulate gene lethality.* The lethality of each gene is set to nonlethal at the beginning. For each lethal protein complex simulated in (b), we randomly sampled a proportion  $p$  of its members, and set the lethality of their corresponding genes as lethal.  $p$  follows the distribution of  $P$ , where

$P$  denotes the proportion of lethal genes among the 94 curated lethal protein complexes identified by the BN model.

In order to test the algorithms' sensitivity to different degrees of overlap, we altered the number of simulated protein complexes  $n$  in (a) from 100 to 1000 with an interval of 100. As  $n$  increases, we would expect higher overlap among the simulated protein complexes. We further quantified the degree of overlap by measuring the proportion of genes that are involved in more than one complex. In order to test the algorithms' sensitivity to different proportions of lethal genes in a lethal protein complex, we altered the distribution of  $p$  from the distribution of  $P$  to that of  $1/2 P$  and  $1/4 P$ . For each given  $n$  and given distribution of  $p$ , we repeated step (a) to (c) for 100 times to obtain 100 simulated datasets.

For each simulated dataset, we applied the BN method to infer the complex lethality given the gene lethality and complex membership simulated above. We measured the prediction accuracy by both the standard AUC and pAUC.2 as introduced in the manuscript. As a comparison, we also applied the HG test to the simulated dataset. Figure S2 gives the box plot of AUC and pAUC.2 for both methods under different degrees of overlap and different distributions of  $p$ .

As shown in Figure S2, over the range of the two factors tested here, the BN model consistently performs better than the HG method. It can be seen that as the degree of overlap increases or the proportion of lethal genes in a lethal complex decreases, the performance of both methods decrease. The amount of improvement of the BN model over the HG method also varies with the two factors. When the proportion of lethal genes in a lethal complex is relatively high, for example, when the distribution of  $p$  equals to that of  $P$ , the amount of improvement of the BN model over the HG method increases steadily as the degree of overlap increases. But when the

proportion of lethal genes in a lethal complex is relatively low, the amount of improvement of the BN model over the HG method remains relatively small for the whole range of degree of overlap tested here. The amount of improvement even starts to decrease slightly as the degree of overlap further increases.

**Table S1:** 94 curated lethal protein complexes identified by the BN model. The complex ID starting with “GO”, “MIPS” and “EBI” represents GO, MIPS and Intact ID, respectively. Total # denotes the total number of genes whose lethality is known. Lethal # denotes the number of genes that are lethal.

| Complex ID     | Description                                                                    | Total # | Lethal # |
|----------------|--------------------------------------------------------------------------------|---------|----------|
| GO:0031261     | DNA replication preinitiation complex                                          | 21      | 21       |
| GO:0005666     | DNA-directed RNA polymerase III complex                                        | 17      | 17       |
| GO:0005656     | pre-replicative complex                                                        | 15      | 15       |
| GO:0000172     | ribonuclease MRP complex                                                       | 10      | 10       |
| GO:0005849     | mRNA cleavage factor complex                                                   | 9       | 9        |
| GO:0000177     | cytoplasmic exosome (RNase complex)                                            | 9       | 9        |
| GO:0005675     | holo TFIIF complex                                                             | 9       | 9        |
| GO:0005655     | nucleolar ribonuclease P complex                                               | 9       | 9        |
| MIPS-130       | Chaperonin containing T-complex TRiC (TCP RING Complex)                        | 8       | 8        |
| GO:0043614     | multi-eIF complex                                                              | 8       | 8        |
| GO:0000145     | exocyst                                                                        | 8       | 8        |
| GO:0030915     | Smc5-Smc6 complex                                                              | 7       | 7        |
| GO:0019774     | proteasome core complex, beta-subunit complex (sensu Eukaryota)                | 7       | 7        |
| GO:0042729     | DASH complex                                                                   | 7       | 7        |
| EBI-1250459    |                                                                                | 6       | 6        |
| GO:0000127     | transcription factor TFIIC complex                                             | 6       | 6        |
| GO:0000506     | glycosylphosphatidylinositol-N-acetylglucosaminyltransferase (GPI-GnT) complex | 5       | 5        |
| GO:0000799     | nuclear condensin complex                                                      | 5       | 5        |
| GO:0042765     | GPI-anchor transamidase complex                                                | 5       | 5        |
| EBI-1208823    |                                                                                | 5       | 5        |
| GO:0000120     | RNA polymerase I transcription factor complex                                  | 5       | 5        |
| MIPS-445.10    | SCF-CDC4 complex                                                               | 5       | 5        |
| GO:0000214     | tRNA-intron endonuclease complex                                               | 4       | 4        |
| GO:0000818     | nuclear MIS12/MIND type complex                                                | 4       | 4        |
| MIPS-290.20.10 | Tim22p-complex                                                                 | 4       | 4        |
| EBI-1209054    |                                                                                | 4       | 4        |
| MIPS-310.10    | NSP1 complex                                                                   | 4       | 4        |
| EBI-852570     |                                                                                | 4       | 4        |
| GO:0031518     | CBF3 complex                                                                   | 4       | 4        |
| GO:0000928     | gamma-tubulin small complex, spindle pole body                                 | 3       | 3        |
| GO:0005662     | DNA replication factor A complex                                               | 3       | 3        |
| GO:0000126     | transcription factor TFIIB complex                                             | 3       | 3        |
| MIPS-180.30    | Geranylgeranyltransferase II (GGTase II)                                       | 3       | 3        |
| EBI-1248655    |                                                                                | 2       | 2        |
| GO:0005672     | transcription factor TFIIA complex                                             | 2       | 2        |
| GO:0005673     | transcription factor TFIIIE complex                                            | 2       | 2        |
| GO:0005785     | signal recognition particle receptor complex                                   | 2       | 2        |
| GO:0005835     | fatty acid synthase complex                                                    | 2       | 2        |

|                   |                                                                   |    |    |
|-------------------|-------------------------------------------------------------------|----|----|
| GO:0005953        | CAAX-protein geranylgeranyltransferase complex                    | 2  | 2  |
| GO:0009328        | phenylalanine-tRNA ligase complex                                 | 2  | 2  |
| GO:0017059        | serine C-palmitoyltransferase complex                             | 2  | 2  |
| GO:0017087        | mitochondrial processing peptidase complex                        | 2  | 2  |
| GO:0018444        | translation release factor complex                                | 2  | 2  |
| GO:0031501        | mannosyltransferase complex                                       | 2  | 2  |
| GO:0031510        | SUMO activating enzyme complex                                    | 2  | 2  |
| GO:0031515        | tRNA (m1A) methyltransferase complex                              | 2  | 2  |
| GO:0042272        | nuclear RNA export factor complex                                 | 2  | 2  |
| GO:0043541        | UDP-N-acetylglucosamine transferase complex                       | 2  | 2  |
| GO:0030684        | preribosome                                                       | 2  | 2  |
| MIPS-260.40       | NSF-SNAP complex                                                  | 2  | 2  |
| MIPS-440.30.10.20 | Prp9p/Prp11p/Prp21p complex                                       | 2  | 2  |
| MIPS-500.10.110   | eIF4E/eIF4G/Pab1p complex                                         | 2  | 2  |
| MIPS-510.190.190  | NC2 complex                                                       | 2  | 2  |
| GO:0032777        | Piccolo NuA4 histone acetyltransferase complex                    | 2  | 2  |
| GO:0032116        | cohesin loading complex                                           | 2  | 2  |
| GO:0035101        | FACT complex                                                      | 2  | 2  |
| GO:0030690        | Noc1p-Noc2p complex                                               | 2  | 2  |
| GO:0030691        | Noc2p-Noc3p complex                                               | 2  | 2  |
| MIPS-310.20       | NSP1-NUP82 complex                                                | 2  | 2  |
| MIPS-290.20.20    | Tim17p-complex                                                    | 2  | 2  |
| GO:0005669        | transcription factor TFIID complex                                | 14 | 13 |
| MIPS-410.35       | Replication complex                                               | 20 | 18 |
| GO:0005732        | small nucleolar ribonucleoprotein complex                         | 19 | 17 |
| GO:0046540        | U4/U6 x U5 tri-snRNP complex                                      | 25 | 22 |
| GO:0008540        | proteasome regulatory particle, base subcomplex (sensu Eukaryota) | 8  | 7  |
| GO:0005847        | mRNA cleavage and polyadenylation specificity factor complex      | 15 | 13 |
| GO:0019773        | proteasome core complex, alpha-subunit complex (sensu Eukaryota)  | 7  | 6  |
| EBI-1250245       |                                                                   | 7  | 6  |
| MIPS-270.10       | Inner Kinetochor Protein Complex                                  | 7  | 6  |
| GO:0005665        | DNA-directed RNA polymerase II, core complex                      | 12 | 10 |
| GO:0005744        | mitochondrial inner membrane presequence translocase complex      | 6  | 5  |
| GO:0008541        | proteasome regulatory particle, lid subcomplex (sensu Eukaryota)  | 10 | 8  |
| GO:0030687        | nucleolar preribosome, large subunit precursor                    | 5  | 4  |
| GO:0005851        | eukaryotic translation initiation factor 2B complex               | 5  | 4  |
| GO:0032040        | small subunit processome                                          | 37 | 29 |
| GO:0030127        | COPII vesicle coat                                                | 8  | 6  |
| GO:0031105        | septin complex                                                    | 4  | 3  |
| GO:0030869        | RENT complex                                                      | 4  | 3  |
| GO:0005681        | spliceosome                                                       | 29 | 21 |

|             |                                                    |    |    |
|-------------|----------------------------------------------------|----|----|
| GO:0005736  | DNA-directed RNA polymerase I complex              | 14 | 10 |
| GO:0001405  | presequence translocase-associated import motor    | 7  | 5  |
| GO:0016592  | Srb-mediator complex                               | 7  | 5  |
| GO:0005852  | eukaryotic translation initiation factor 3 complex | 7  | 5  |
| GO:0030008  | TRAPP complex                                      | 10 | 7  |
| MIPS-60     | Anaphase promoting complex (APC)                   | 10 | 7  |
| GO:0000243  | commitment complex                                 | 11 | 7  |
| GO:0016586  | RSC complex                                        | 16 | 10 |
| GO:0031932  | TORC 2 complex                                     | 7  | 4  |
| GO:0005742  | mitochondrial outer membrane translocase complex   | 7  | 4  |
| GO:0008250  | oligosaccharyl transferase complex                 | 9  | 5  |
| MIPS-520.10 | ER protein-translocation complex (Sec complex)     | 9  | 5  |
| GO:0031011  | INO80 complex                                      | 9  | 5  |
| MIPS-310    | Nuclear pore complex (NPC)                         | 22 | 12 |
| GO:0000783  | nuclear telomere cap complex                       | 11 | 5  |

**Figure S1:** Genes in *S. cerevisiae* are classified into four groups according to their lethality and the lethality of protein complexes to which they belong. Within each group, the pie chart represents the distribution of genes with respect to the lethality of their orthologs in *D. melanogaster*. The lethal protein complexes were identified as in Figure 1(b).

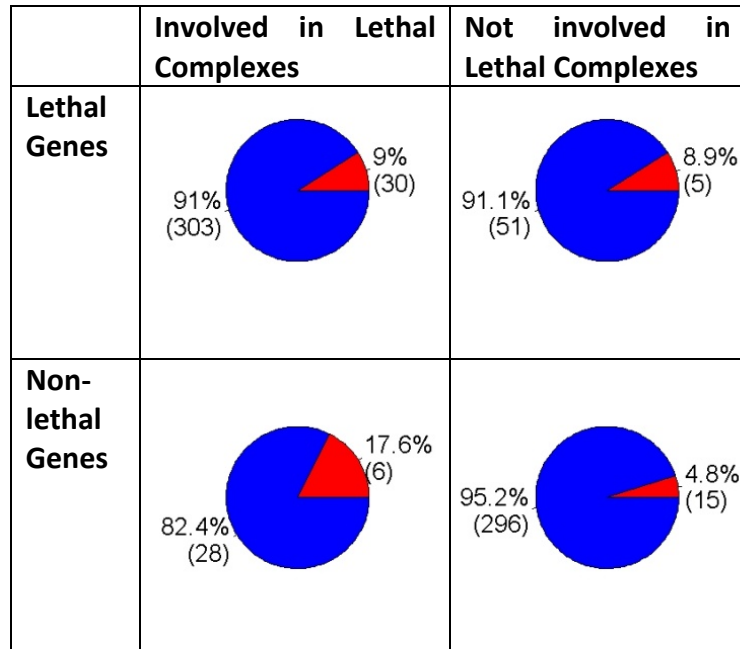

- genes whose orthologs in *D. melanogaster* are related to cell growth and viability
- genes whose orthologs in *D. melanogaster* are related to cell growth and viability

**Figure S2:** simulation results. The performance of the BN model and the HG method in identifying lethal complexes given different degrees of overlap among protein complexes and different distributions of the proportion of lethal genes in a lethal complex.

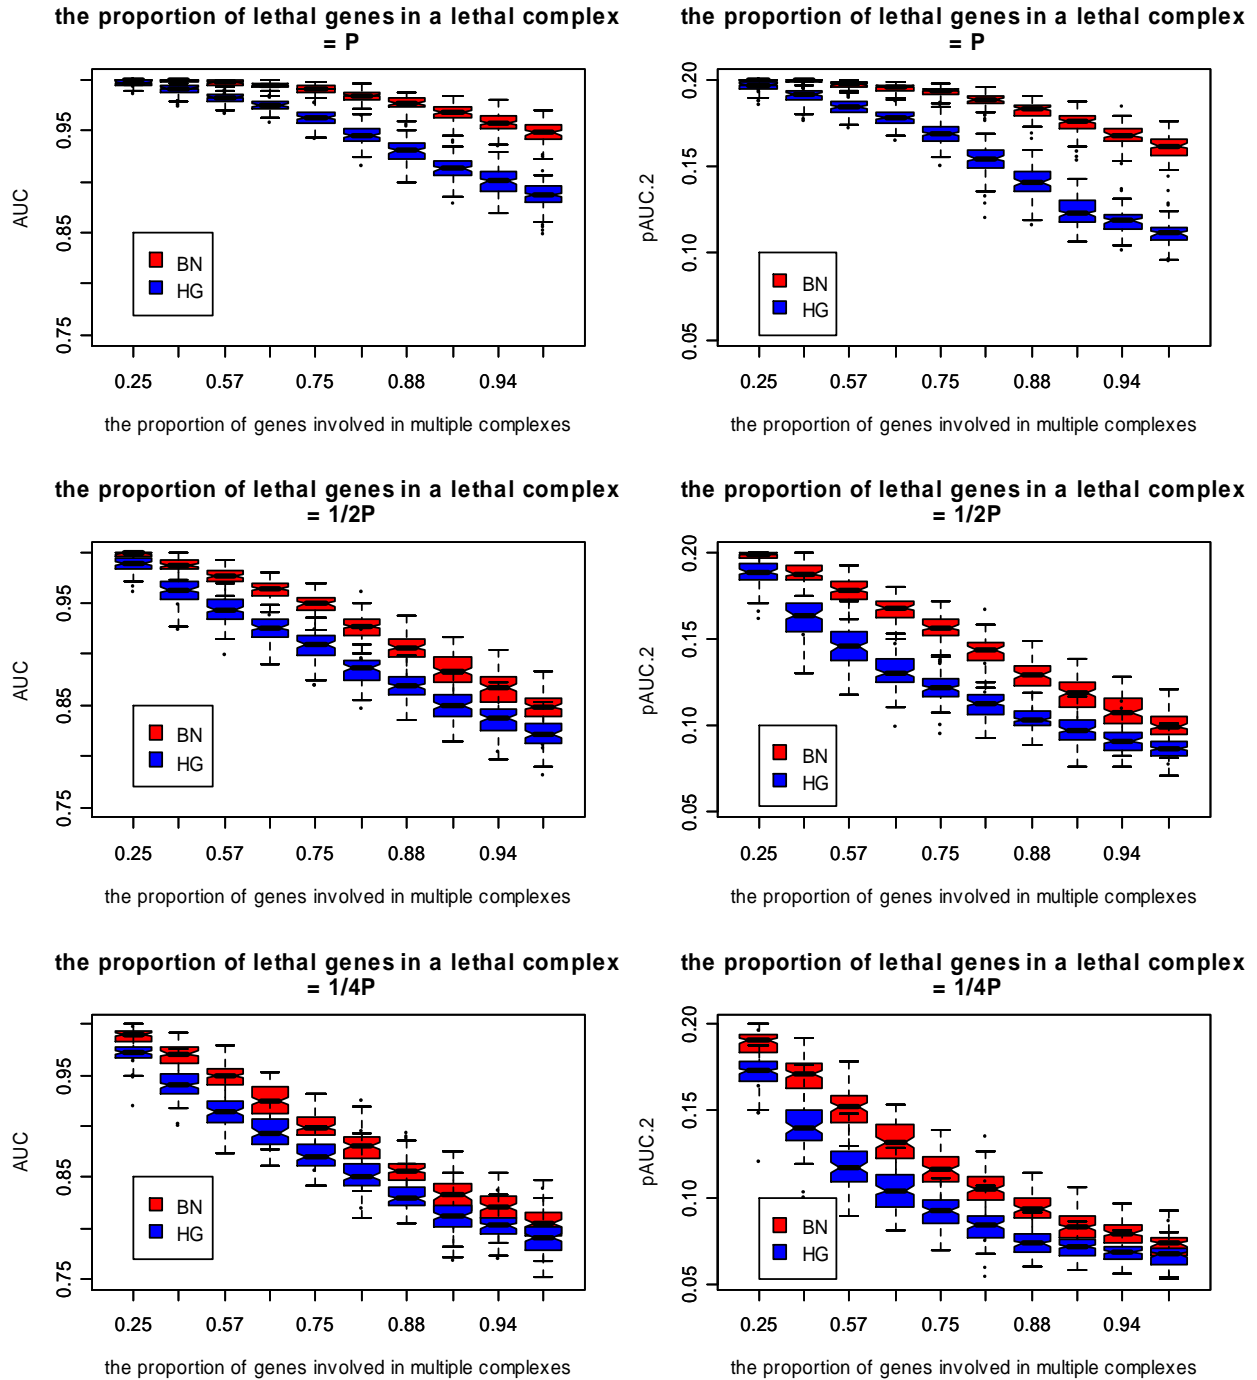

Supplement: gb-2008-9-12-r174-S1.pdf [file gb-2008-9-12-r174-S1.pdf]
