# Supplementary material for: Prioritizing functional modules mediating genetic perturbations and their phenotypic effects: a global strategy
Source: PubMed Central journal article supplement (PMC2646278; doi:10.1186/gb-2008-9-12-r174), 2008-12-16

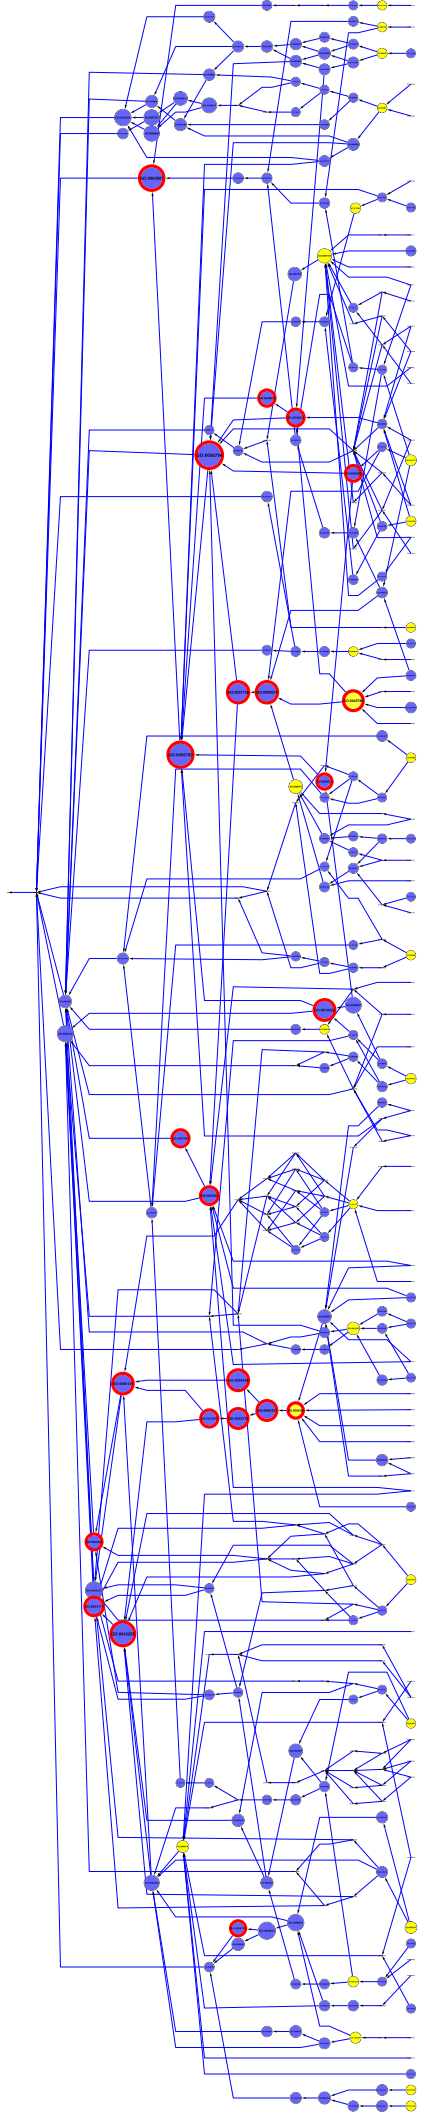

Supplement: gb-2008-9-12-r174-S2.pdf [file gb-2008-9-12-r174-S2.pdf]
